## Current Bibliography.

Prepared by the Editor with the assistance of Miss THURSBY-PELHAM.

**N**OTE. The scope of the Bibliography is limited in the main to the area covered by the Council's activities, but there are included papers of general interest relating to other areas in the North Temperate and Arctic regions and exceptionally elsewhere. Limnological references are not as a rule given, but papers relating to brackish waters and to salmon and freshwater fish studied by the Council are included.

The classification of entries follows in a general way that adopted in Dr. ALLEN's Selected Bibliography published in Vol. I, Nos. 1 and 2 of the Journal, and since reprinted (Price, 1 Kr.).

Subscribers and those on the distribution list will receive regularly upon application to the Administrative Secretary copies of the Bibliography printed on one side of the page only, for use in making up card indices.

The Editor will be glad to be advised of emendations and additions to the Bibliography.

## Physical and Biological Conditions in the Sea.

### GENERAL HYDROGRAPHY

- BAILLY, P. Note de technique océanographique à la suite d'une croisière scientifique aux Iles Canaries. Ann. de l'Inst. Océanogr. VII, 365—81, Monaco, 1930.
- BENCKER, H. The Bathymetric Soundings of the Oceans. Hydrographic Review, VII, No. 2, 64—97, Monaco, 1930.
- BERG, V. A. Sur la nécessité d'une détermination précise du niveau moyen de la mer Baltique et sur la méthode de le déterminer. III. Hydrologische Konferenz der Baltischen Staaten, Warschau, Mai 1930.
- BURKOV, P. J., und ZAMJATKIN, J. N. Anszüge aus den Reiseberichten des Kommandos des Expeditionsschiffes "Persey". Ber. des wiss. Meeresinst. Moscow, IV, Lief. 1, 107—42, 1929. (In Russian.)
- CLAUDE, G. Sur l'utilisation de l'énergie thermique des mers. C. R. Acad. Sci. Paris, CXCI, 746—50, 810—13, 1930.
- COLLINDER, P. A Summary of Hydrographical Results obtained during an Arctic Cruise in 1929. Hydrographic Review, VII, No. 2, 37—43, Monaco, 1930.
- CONS. PERM. INT. POUR L'EXPLOR. DE LA MER. Bulletin Hydrographique pour l'année 1929. Copenhagen, 1930.
- LE DANOIS, ED. Remarques hydrologiques sur la périodicité des transgressions et leur relation avec d'autres phénomènes cosmiques. La Pêche Maritime, XIII, 825—26, 1930.
- DERJUGIN, K. M. Ozeanographische Forschungen im Weissen Meer. Arktis, Nr. 1/2, 1930.
- ELEFVING, G. Zur Reduktion von Echolotungen. Merentut. Julk. No. 69, Helsinki, 1930.
- FLEMING, J. A. The Seventh Cruise of the Carnegie. National Research Council. Trans. American Geophys. Union. 10th and 11th Ann. Meetings 1929 and 1930, 251—57, Washington, D. C., U. S. A. 1930.
- GRANQVIST, G. Übersicht der Eisverhältnisse im Winter 1928—29 und 1929—30 an den Küsten Finnlands. Merentut. Julk. No. 64 ja 71, Helsinki, 1929 ja 1930. (In Finnish, German Résumé.)
- HUTCHINSON, A. H., LUCAS, G. C., and MacPHAIL, M. An Oceanographic Survey of the Strait of Georgia. Contrib. Marine Biology, 1930, 87—90, Stanford University Press, California, U. S. A.
- ISELIN, C. A Report on the Coastal Waters of Labrador, based on Explorations of the "Chance" during the summer of 1926. Proc. American Acad. Arts and Sciences, LXVI, No. 1, 1930.
- JAPAN Semi-Annual Report Oceanographical Investigation (January-June 1930) No. 46. Imp. Fish. Exper. Stat., Dept. of Agric. and Forestry, Tokyo, Japan, 1930.
- MAXIMOFF, G. S. Sur la nécessité de l'étude du niveau effectif de l'océan mondial à l'aide de nivellements de haute précision. III. Hydrologische Konferenz der Baltischen Staaten, Warschau, Mai 1930.
- METEOROLOGICAL OFFICE. The Meteorological Glossary. 2nd Edition. Meteorological Office, London, 1930.
- OELLRICH, H. Die Eisverhältnisse des Winters 1929—30 in den ausser-deutschen europäischen Gewässern. Ann. der Hydrogr. und Marit. Meteor. LVIII, 427—33, 1930.
- FARKER, W. E. Hydrographic Work of the United States Coast and Geodetic Survey. National Research Council. Trans. American Geophys. Union. 10th and 11th Ann. Meetings 1929 and 1930, 281—84, Washington, D. C., U. S. A. 1930.

- RENQVIST, H. Wasserstandsangaben 1927. Merentut. Julk. No. 67, Helsinki 1930. (In Finnish, German Résumé.)
- ROSSOLIMO, A. I., FLEROV, B. K., MESSJATZEV, I. I., ZENKEWITSCH, L. A., und JASCHNOV, W. A. Berichte der Expeditionsleiter (1926—1928) 9te—17te Expedition. Übersicht über die Stationen (1926—1928). Ber. des wiss. Meeresinst. Moscow, IV, Lief. 1, 5—106 und 143—51, 1929. (In Russian, German Résumé.)
- RUNDO, A. Sur l'évaluation de l'apport des eaux fluviales à la Baltique. III. Hydrologische Konferenz der Baltischen Staaten Warschau, Mai 1930.
- SCHOTT, G. Allgemeine Untersuchungen: III. 1. Die hydrographischen Arbeiten der Jahre 1926—1929. Ber. der Deutsch. Wiss. Komm. für Meeresforsch. N. F. V, 211—16, 1930.
- SCHULZ, B. Die Ostseeuntersuchungen: V. 6. Die hydrographischen Arbeiten auf der Ostseefahrt des Reichsforschungsdampfers "Poseidon" im April 1929. Ber. der Deutsch. Wiss. Komm. für Meeresforsch. N. F. V, 321—23, 1930.
- SMITH, E. H. Some preliminary results of the Coast Guard's Marion Expedition to Davis Strait. National Research Council. Trans. American Geophys. Union. 10th and 11th Ann. Meetings 1929 and 1930, 245—51, Washington, D. C., U. S. A. 1930.
- STENIJ, S. E. Wasserstandsangaben 1926. Merentut. Julk. No. 62, Helsinki 1929. (In Finnish, German Résumé.)
- THOULET, J. Le cycle de l'eau; les colonnes liquides et les cônes de giration. C. R. Acad. Sci. Paris, CXCI, 1142—4, 1930.
- WIESE, W. Die Bedeutung systematischer Untersuchungen des Barentsmeeres für meteorologische und hydrologische Prognosen. Explorat. des Mers Russes, Fasc. 11, 1930.
- WITTING, R. Merentutkimuslaitoksen Toiminta Vuonna 1928 ja 1929. Merentut. Julk. No. 63 ja 72, Helsinki 1929 ja 1930.
- WITTING, R. Die Lage des Wasserspiegels des Baltischen Meeres. III. Hydrologische Konferenz der Baltischen Staaten, Warschau, Mai 1930.

### Physics and Chemistry of Sea Water.

- SCHMITT, W. Some remarks on the biological phases of oceanography. National Research Council. Trans. American Geophys. Union. 10th and 11th Ann. Meetings 1929 and 1930, 292—95, Washington, D. C., U. S. A. 1930.
- SCHULZ, B. Die Luft im Meere und ihre Beeinflussung durch das Leben der Organismen. Seville Oceanographical Conference Publications, Madrid 1930.

### TEMPERATURE AND SALINITY

- BOROWIK, J. Salinity Variations in the Gulf of Danzig. III. Hydrologische Konferenz der Baltischen Staaten, Warschau, Mai 1930.
- BROOKS, C. F. Surface Temperature, Density and Salinity Profiles across the Straits of Florida. National Research Council. Trans. American Geophys. Union. 10th and 11th Ann. Meetings 1929 and 1930, 284—92, Washington, D. C., U. S. A. 1930.
- BROOKS, C. F., and FITTON, E. M. Weekly Succession of Gulf Stream Temperatures in the Straits of Florida. Monthly Weather Review, LVIII, 273—80, U. S. A. 1930.
- BUCH, K. Über den Einfluss der Temperatur auf die pH-Bestimmung des Meerwassers. Merentut. Julk. No. 61, Helsinki 1929.
- CUMMINGS, N. W. Certain limitations on the possible values of the ratio of heat losses by convection and by evaporation at a water surface. Monthly Weather Review, LVIII, 144—46, U. S. A. 1930.
- FREUNDLER, M. P., et PILAUD, M. Sur l'Eau normale méditerranéenne. Ière partie. Historique, Discussions des Méthodes, Propositions. Bull. de la Stat. Océanogr. de Salammbô, No. 19, 1930.
- GRANQVIST, G. Regelmässige Beobachtungen von Temperatur und Salzgehalt des Meeres Januar 1928—Juni 1929. Merentut. Julk. No. 65, Helsinki 1930.
- GRANQVIST, G. Croisière Thalassologique et Observations en bateaux routiers en 1929. Merentut. Julk. No. 70, Helsinki 1930.

- JOHNSON, M. W., and THOMPSON, T. G. The Sea Water at the Puget Sound Biological Station from September 1927 to September 1928. Publications Puget Sound Biol. Stat. VII, 119—28, U. S. A. 1930.
- MATUDAIRA, Y. On the Chlorine Titration adopted in the Imperial Marine Observatory. Journ. of Oceanogr. II, 281—85, Imp. Mar. Obser. Kobe, Japan, 1930. (In Japanese.)
- SEWELL, S. Temperature and salinity of the surface waters of the Bay of Bengal and Andaman Sea, with references to the Laccadive Sea. Mem. Asiatic Soc. of Bengal, IX, No. 1—5, 1930.
- STENIŃ, S. E. Croisière Thalassologique et Observations en bateaux routiers en 1928. Merentut. Julk. No. 66, Helsinki 1929.
- WENNER, F., SMITH, E. H., and SOULE, F. M. Apparatus for the determination aboard ship of the salinity of sea-water by the electrical-conductivity method. Bureau of Standards Journ. of Research, V, 711—32, U. S. Dept. of Commerce, Washington, D. C. 1930.

#### NITROGEN ION CONCENTRATION AND DISSOLVED GASES

- MOBERG, E. The Distribution of Oxygen in the Pacific. Contrib. Marine Biology, 1930, 69—78, Stanford University Press, California, U. S. A.
- NICLOUX, M. Sur le dosage de l'oxygène dans l'eau de mer. C. R. Acad. Sci. Paris, CXCI, 259—61, 1930.
- THOMPSON, T. G. A Progress Report on Ionic Ratios and Specific Gravity of Sea Water. Contrib. Marine Biology, 1930, 79—81, Stanford University Press, California, U. S. A.

#### NITROGENOUS COMPOUNDS

- BRANDT, K. Allgemeine Untersuchungen. III. 2. Die für die D. W. K. 1926—1929 durchgeführten Arbeiten. Ber. der Deutsch. Wiss. Komm. für Meeresforsch. N. F. V, 217—21, 1930.

#### PHOSPHATES AND NITRATES

- THOMPSON, T. G., MCCORKELL, R., and BONNAR, R. U. A Summary of Studies of the Phosphate Content of the Waters of the San Juan Archipelago. Contrib. Marine Biology, 1930, 82—86, Stanford University Press, California, U. S. A.

#### OTHER CONSTITUENTS

- PETTERSSON, H. Teneur en radium des dépôts de mer profonde (Princesse Alice II et Challenger). Résultats des Camps. Scient. LXXXI, Monaco, 1930.

#### Currents.

- ANON. Local Observations of the Set and Drift of the Gulf Stream. Marine Observer, VII, 238—39, 1930.
- DEMEŁ, K. Les courants près de Hel sur la côte polonaise. Archives d'Hydrobiol. et d'Ichthyol. IV, 287—310, 1929. Warszawa.
- ISELIN, C. O. Recent work on the dynamic oceanography of the North Atlantic. National Research Council. Trans. American Geophys. Union. 10th and 11th Ann. Meetings 1929 and 1930, 82—89, Washington D. C., U. S. A. 1930.
- KOLUPAILA, S. Über die Verteilung der Geschwindigkeiten auf der Lotrechten des Stromes. III. Hydrologische Konferenz der Baltischen Staaten, Warschau, Mai 1930.
- LÉONHARDT, R. Détermination de la vitesse et des directions des courants. Bull. de la Soc. d'Océanogr. de France, X, 999—1005, 1930.
- McEWEN, G. F. A Survey of Some of the Methods used in Modern Dynamical Oceanography. Contrib. Marine Biology, 1930, 57—68, Stanford University Press, California, U. S. A.
- NIKURADSE, J. Untersuchungen über die Strömungen des Wassers in konvergenten und divergenten Kanälen. Aus dem Kaiser-Wilhelm-Inst. für Strömungsforschung, Göttingen, Berlin, 1929.
- SUDA, K., HIDAKA, K., KAWASAKI, H., MIZUUTI, M., and MATUDAIRA, Y. The Results

- of the Oceanographical Observations on board M. S. "Syunpu Maru" in the Southern Part of the Japan Sea in the Summer of 1928 (Part 2). Journ. of Oceanogr. II, 155—264, Imp. Mar. Observ. Kobe, Japan, 1930. (In Japanese, English Summary and Tables.)
- SVERDRUP, H. U. Some oceanographic results of the Carnegie's work in the Pacific — the Peruvian current. National Research Council, Trans. American Geophys. Union. 10th and 11th Ann. Meetings 1929 and 1930, 257—64, Washington D. C., U. S. A. 1930.
- TAIT, J. B. The Surface Water Drift in the Northern and Middle Areas of the North Sea and in the Faroe-Shetland Channel. Part II, Section 1. A Cartographical Analysis of the Results of Scottish Surface Drift-Bottle Experiments commenced in the year 1910. Fish. Board for Scotland, Sci. Invest. 1930, No. IV.

## TIDES

- PETTERSSON, O. Flodkraften och Vattenutbytet mellan de Tropiska och de Polara Haven. Svenska Hydrografisk-Biologiska Komm. Skrifter, Ny Serie: Hydrografi VIII. Göteborg, 1930.
- TENANI, M. Sur les marées de la Méditerranée orientale. C. R. Acad. Sci. Paris, CXCI, 275—6, 1930.

## WIND

- MATAKIEWICZ, M. Forschungen über d. Verhältnis der mittl. Profildgeschwindigkeit zur grössten oberflächengeschwindigkeit in künstlichen Betten u. Vorschlag zu einer Messmethode. III. Hydrologische Konferenz der Baltischen Staaten, Warschau, Mai 1930.
- SOLDAN, W. Über Geschwindigkeitsformeln. III. Hydrologische Konferenz der Baltischen Staaten, Warschau, Mai 1930.

**Oceanography—Miscellaneous.**

- ANON. Geographic and oceanographic research in Indian waters, Calcutta 1925 to 1929. Mem. Asiatic Soc. of Bengal, IX, Nr. 1—5, 1930.
- BIGELOW, H. B. Oceanography. National Research Council. Trans. American Geophys. Union. 10th and 11th Ann. Meetings 1929 and 1930, 121—24, Washington D. C., U. S. A. 1930.
- BIGELOW, H. B. The Progress of the Woods Hole Oceanographic Institution. National Research Council. Trans. American Geophys. Union. 10th and 11th Ann. Meetings 1929 and 1930, 229—32, Washington D. C., U. S. A. 1930.
- CHARCOT, J. B. La Mer du Groenland. Croisières du "Pourquoi-Pas". Paris, 1929.
- DEFANT, A. Ozeanographie. Aus 50 Jahren Deutscher Wissenschaft, G. Abb. (Schmidt-Out-Festschrift) 1930.
- DISCOVERY COMMITTEE. Station List, 1927—1929. Discovery Reports, III, 1—134, Cambridge, 1930.
- FISH, C. J. The Oceanographic Work of the Buffalo Museum of Science. National Research Council. Trans. American Geophys. Union. 10th and 11th Ann. Meetings 1929 and 1930, 275—80, Washington D. C., U. S. A. 1930.
- FUCHS, V. E., and WHITTARD, W. F. The East Greenland Pack-Ice and the Significance of its derived Shells. Geographical Journal, LXXVI, 419—25, 1930.
- MAWSON, D. The Antarctic Cruise of the "Discovery". Geogr. Review, New York 1930.
- PARKER, W. E. The importance of oceanography to navigation and commerce. National Research Council. Trans. American Geophys. Union. 10th and 11th Ann. Meetings 1929 and 1930, 89—94, Washington D. C., U. S. A. 1930.
- RIISER-LARSEN, H. The "Norvegia" Antarctic Expedition 1929—30. Geogr. Review, New York 1930.
- STEERS, J. A. A geographical Introduction to the Biological Reports. Great Barrier Reef Expedition 1928—29, Scient. Reports, III, 1—15, British Museum (Natural History) London 1930.
- WAYLAND VAUGHAN, T. Recent Oceanographic research at the Scripps Institution of Oceanography, University of California. National Research Council. Trans.

- American Geophys. Union. 10th and 11th Ann. Meetings 1929 and 1930. 240—45, Washington D. C., U. S. A. 1930.
- WAYLAND VAUGHAN, T. The Oceanographical Point of View. *Contrib. Marine Biology*, 1930, 40—56, Stanford University Press, California, U. S. A.
- YONGE, C. M. Origin, Organisation and Scope of the Expedition. Great Barrier Reef Expedition 1928—29, I, 1—12, British Museum (Natural History) London, 1930.

#### Plankton.

- BALSS, H. Wanderungen bei Decapoden (Crustaceen). *Ergebnisse der Biologie*, VI, 1930.
- KOFOID, C. A. Factors in the Evolution of the Pelagic Ciliata, the Tintinnoinea. *Contrib. Marine Biology*, 1930, 1—39, Stanford University Press, California, U. S. A.
- KRAMP, P. L. Hydromedusae collected in the south-western part of the North Sea and in the Eastern Part of the Channel in 1903—1914. *Mem. du Musée Roy. d'Hist. Nat. de Belgique*, No. 45, Bruxelles, 1930.
- MEEK, A. Further Note on *Bipinnaria asterigera* from the Northumberland Plankton. *Proc. Zool. Soc. London*, 355—56, 1930.
- MOBERG, E. C. The interrelation between diatoms, their chemical environment and upwelling water in the sea, off the coast of South California. Repr. from the Proc. IV. Pacif. Science Congress, Java, 1929.
- PAVILLARD, J. Sur quelques formes intéressantes ou nouvelles du phytoplankton (Diatomées et Péridiniens) des Croisières du Prince Albert Ier de Monaco. *Bull. de l'Inst. Océanogr.* No. 558, Monaco, 1930.
- RAMMNER, W. Phyllopora. Die Tierwelt der Nord- und Ostsee (Grimpé u. Wagler) Lief. XVIII, Teil X. a. 1930.
- SAVAGE, R. E. The Influence of *Phaeocystis* on the Migrations of the Herring. *Fishery Investigations*, Ser. II, XII, No. 2, 1930.
- WITTING, R. Die Vereinheitlichung des thalassologischen Netzes des Baltischen Meeres. III. Hydrologische Konferenz der Baltischen Staaten, Warschau, Mai 1930.

#### CONDITIONS OF PRODUCTION IN THE SEA

- BUDDENBROCK, W. v. Allgemeine Untersuchungen. Die für die D. W. K. 1928 und 1929 durchgeführten Arbeiten. *Ber. der Deutsch. Wiss. Komm. für Meeresforsch.* N. F. V, 222—29, 1930.
- DERJUGIN, K. M. Hydrologie und Biologie. *Explorat. des Mers Russes*, Fasc. 11, 1930.
- KNIPOWITSCH, N. M. Hydrologie und Fischerei. *Explorat. des Mers Russes*, Fasc. 11, 1930.

#### MARINE BACTERIA

- CRANSTON, J. A., and LLOYD, B. Experiments on Bacterial Denitrification. *Journ. Roy. Tech. College, Glasgow*, 301—15, 1930.
- ELLIS, D. Studies of the Sulphur Bacteria. *Journ. Roy. Tech. College, Glasgow*, 316—27, 1930.
- ELLIS, D., and STODDART, J. H. The Chemical Changes in Pools containing vegetable remains infected with Sulphuric Bacteria. *Journ. Roy. Tech. College, Glasgow*, 336—46, 1930.
- LLOYD, B., and JOHNSTON, A. On the formation of melanin by bacteria. *Journ. Roy. Tech. College, Glasgow*, 346—53, 1930.
- NIEL, C. B. VAN. Photosynthesis of Bacteria. *Contrib. Marine Biology*, 1930, 161—69, Stanford University Press, California, U. S. A.

#### MARINE ALGAE

- FRYE, T. C., and PHIFER, M. W. Some Questions in the Life Histories of the Phaeo-phyceae with particular reference to *Scytosiphon lomentarius*. *Contrib. Marine Biology*, 1930, 234—45, Stanford University Press, California, U. S. A.
- SMITH, G. M. Observations on Some Siphonaceous Green Algae of the Monterey Peninsula. *Contrib. Marine Biology*, 1930, 222—33, Stanford University Press, California, U. S. A.

**Bottom Deposits.**

ANON. A study of the nature of the sea-bed and of the deep-sea deposits of the Andaman Sea and Bay of Bengal. Mem. Asiatic Soc. of Bengal, IX, Nr. 1—5, P. II. 1930.

**Bottom Fauna.**

## GENERAL

SUDA, K., HIDAKA, K., KAWASAKI, M., MIZUUTI, M., and MATUDAIRA, Y. The Results of the Oceanographical Observations on board M. S. "Syunpu Maru" in the Southern Part of the Japan Sea in the summer of 1928 (Part 2). Journ. of Oceanogr. II, 155—264, Imp. Mar. Observ. Kobe, Japan, 1930. (In Japanese, English Tables and Summary.)

## SPECIAL GROUPS

BALSS, H. Wanderungen bei Decapoden (Crustaceen). Ergebnisse der Biologie, VI, 1930.

BURTON, M. Norwegian Sponges from the Norman Collection. Proc. Zool. Sec. London, 487—546, 1930.

DJAKONOV, A. Zur Frage der Artsberechtigung der mülleri-groenlandica Gruppe der Asteridengattung *Leptasterias* mit Beschreibung einer neuen Art aus dem Sibirischen Eismeer. Zool. Anz. XCI, 27—50, 1930.

HAGMEIER, A. Eine Fluktuation von *Maetra (Spisula) subtruncata* da Costa an der ostfriesischen Küste. Ber. der Deutsch. Wiss. Komm. für Meeresforsch. N. F. V, 126—55, 1930.

HAGMEIER, A. Die Bodenfauna der Ostsee im April 1929. Ber. der Deutsch. Wiss. Komm. für Meeresforsch. N. F. V, 156—73, 1930.

MERCIER, J. Notes échinologiques. VI. Nouvelles observations sur des anomalies du test de *Psammechinus miliaris* Klein. Bull. de l'Inst. Océanogr. de Monaco, No. 559, 1930.

MUSIO, Z. Ricerche statistiche sulle conchiglia di alcune specie di *Cardium*. R. Com. Talasso. Ital. Mem. CLXXV, 1930. Venezia.

NIERSTRASZ, H. F., und STEKHOVEN, J. H. S. Isopoda genuina. Die Tierwelt der Nord- und Ostsee, (Grimpe u. Wagler), Lief. XVIII, Teil X. e<sub>2</sub>, 1930.

NIERSTRASZ, H. F., und STEKHOVEN, J. H. S. Anisopoda. Die Tierwelt der Nord- und Ostsee (Grimpe u. Wagler) Lief. XVIII, Teil X. e<sub>3</sub>, 1930.

ORTON, J. H., and FRASER, J. H. Rate of Growth of the Common Starfish. Nature, CXXVI, 567, 1930.

ROBSON, G. C. Cephalopoda, I. Octopoda. Discovery Reports, II, 371—402, London, 1930.

SCHILDER, F. A. Beiträge zur Kenntnis der Cypræacea (Moll., Gastr.) III. Zool. Anz. XCII, 67—78, 1930.

STEINMANN, P. Eine neue getrenntgeschlechtliche marine Triclade von der bretonischen Nordküste (*Tricladida hysteroeursaria*, Fam. Cercyridae, Genus Cercyra.) Zool. Anz. XCII, 147—52, 1930.

THOMPSON, H. The Tunicata of the Scottish Area. (Part 1). Fish. Board for Scotland, Scient. Invest. 1930, No. 3.

VAYSSIÈRE, A. Étude zoologique et anatomique sur quelques Gastéropodes Prosobranches provenant des Campagnes scientifiques du Prince Albert Ier de Monaco. Résultats des Camps. Scient. LXXX, Monaco, 1930.

YONGE, C. M. Studies on the Physiology of Corals. I. Feeding Mechanisms and Food. Great Barrier Reef Expedition 1928—29, Scient. Reports, I, 13—57, British Museum (Natural History), London, 1930.

YONGE, G. M., and NICHOLLS, A. G. Studies on the Physiology of Corals. II. Digestive Enzymes, and Notes on the Speed of Digestion. Great Barrier Reef Expedition 1928—29, Scient. Reports, I, 59—91, British Museum (Natural History) London, 1930.

**Fishery Investigations.**

## GENERAL

BRANDT, K. Bericht der Preussischen Kommission für wissenschaftliche Untersuchung der deutschen Meere in Kiel über ihre Tätigkeit im Rechnungsjahre 1929. Mitt. des Deutsch. Seefisch. Ver. XXXXVI, 483—85, 1930.

- BURKOV, P. J., and ZAMJATKIN, J. N. Auszüge aus den Reiseberichten des Kommandos des Expeditionsschiffes "Persey". Ber. des wiss. Meeresinst. Moscow, IV, Lief. 1, 107—42, 1929. (In Russian.)
- CONS. PERM. INT. POUR L'EXPLOR. DE LA MER. Procès-Verbaux, Mai-Juin 1930. Rapp. et Proc.-Verb. des Réunions, LXVI, Copenhague, 1930.
- DEVELOPMENT COMMISSION. Twentieth Report of the Development Commissioners being for the year ended 31st March, 1930. London, 1930.
- EHRENBAUM, E. Die Nordseeuntersuchungen. Die Arbeiten der D. W. K. in der Fischereibiologischen Abteilung des Zoologischen Staatsinstituts Hamburg, 1926—1929. Ber. der Deutsch. Wiss. Komm. für Meeresforschung, N. F. V, 264—79, 1930.
- HEINRICI, C. Die Ostseeuntersuchungen. Einleitung. Ber. der Deutsch. Wiss. Komm. für Meeresforsch. N. F. V, 280—81, 1930.
- HENKING, H. Die Ostseeuntersuchungen. Die für die D. W. K. 1926—1929 durchgeführten Arbeiten. Ber. der Deutsch. Wiss. Komm. für Meeresforsch. N. F. V, 282—90, 1930.
- JENKINS, J. T. Science and the Sea Fisheries: Have hopes been fulfilled? Fishing News, 56, 27-XII-30.
- MIELCK, W. Die Nordseeuntersuchungen. Die Arbeiten der D. W. K. in der Biologischen Anstalt auf Helgoland und die übrigen fischereibiologischen Arbeiten der Anstalt, 1926—1929. Ber. der Deutsch. Wiss. Komm. für Meeresforsch. N. F. V, 230—63, 1930.
- ROSSOLIMO, A. I., FLEROV, B. K., MESSJATZEV, I. I., ZENKEWITSCH, L. A., and JASCHNOV, W. A. Berichte der Expeditionsleiter (1926—1928). 9te—17te Expedition. Übersicht über die Stationen (1926—1928). Ber. des wiss. Meeresinst. Moscow, IV, Lief. 1, 5—106, und 143—51, 1929. (In Russian, German Résumé.)
- SCOTLAND. Annual Report 1929—30 of the Scottish Marine Biological Association. Glasgow, 1930.
- STRODTMANN, S. Die Ostseeuntersuchungen: Die Arbeiten der D. W. K. in der Ostseeabteilung Hamburg, 1926—1929. Die Ostseefahrt des Reichsforschungsdampfers "Poseidon" im April 1929. Ber. der Deutsch. Wiss. Komm. für Meeresforsch. N. F. V, 298—320, 1930.

#### COMMERCIAL FISHERIES

- BELGIUM. Treizième Rapport Annuel sur la Pêche maritime, 1929. Ministère de l'Agriculture, Office de la pêche maritime, Bruges, 1930.
- MIEZIS, V. Bulletin Statistique des Pêches Maritimes de Lettonie, Année 1929. Riga 1930.
- MORTENSEN, F. V. Fiskeri-Beretning for Aaret 1929. København 1930.
- NORWAY. Norges Fiskerier, 1928. Norges Offisielle Statistik, VIII, Oslo, 1930.
- PERARD, J. Les huiles, les farines, les engrais de poissons. La Pêche Maritime, XIII, 968 et 996, 7-XII-30 et 14-XII-30.
- QUIBBON. Notes on Fish and Fisheries: The Industry's greatest problem. Fish Trades Gazette, 21, 1-XI-30.
- ZAROTSCHENZEFF, M. T. Les méthodes américaine de congélation rapide. La Pêche Maritime, XIII, 385—87, 1930.

#### FISHING GEAR

- ANSON, P. F. Fishing Boats and Fisher Folk on the East Coast of Scotland. London, 1930.

#### Fishes.

##### GENERAL

- BAUDIN, L. Variations des échanges respiratoires des Poissons en fonction de la pression barométrique. C. R. Acad. Sci. Paris, CXCI, 530—2, 1930.
- BOURGUIGNON, G., et VERRIER, M. L. Le mécanisme de l'accommodation chez les Téléostéens. C. R. Acad. Sci. Paris, CXCI, 73—7, 1930.
- CHAUCHARD, A. et B. Le sommeil par compression du cerveau chez les Poissons. C. R. Acad. Sci. Paris, CXC, 1520—2, 1930.



- DESBRÉSSES, P.: Présence du Squale féroce: "Odontaspis ferox" Agassiz dans le Golfe de Gascogne. Bull. de la Soc. Zool. de France, LV, 232—35, 1930.
- FONTAINE, M. Sur le parallélisme existant chez les Poissons entre leur résistance aux variations de salinité et l'indépendance de leur milieu intérieur. C. R. Acad. Sci. Paris, CXCI, 796—8, 1930.
- FONTAINE, M. Modifications du milieu intérieur des poissons potamoïques au cours de la reproduction. C. R. Acad. Sci. Paris, CXCI, 736—7, 1930.
- FONTAINE, M. Recherches sur le milieu intérieur de la lamproie marine (*Petromyzon marinus*). Ses variations en fonction de celles du milieu extérieur. C. R. Acad. Sci. Paris, CXCI, 680—2, 1930.
- KÜNNE, CL. Über Laichen und Entwicklung von *Zeugopterus punctatus* im Aquarium der Biologischen Anstalt auf Helgoland. Ber. der Deutsch. Wiss. Komm. für Meeresforsch. N. F. V, 174—78, 1930.
- LUMBY, J. R. Fish and Temperature of the Sea. Marine Observer, VIII, 9—11, 1931.
- NORMAN, J. R. Oceanic Fishes and Flat-Fishes collected in 1925—1927. Discovery Reports, II, 261—370, London, 1930.
- SCHERING, L. Die Wanderungen der Fische. II. Ergebnisse der Biologie, VI, 1930.
- STEKHOVEN, J. H. S. Einige Beobachtungen über die Bewegungen der Seenadel. Zool. Anz. XCII, 141—46, 1930.
- SUMNER, F. B., and KEYS, A. B. The effects of differences in the apparent source of illumination upon the shade assumed by a flat-fish on a given background. Physiol. Zool. II, 495—504, 1930.

## EGGS AND LARVAE

- ROULE, L., et ANGEL, F. Larves et Alevins de Poissons provenant des Croisières du Prince Albert Ier de Monaco. Résultats des Camps. Scient. LXXXIX, Monaco, 1930.
- SANZO, L. Giovanissimo stadio larvale di *Xiphias gladius* L. di mm. 6,4. R. Com. Talasso. Ital. Mem. CLXX, Venezia, 1930.

## PLAICE AND OTHER PLEURONECTIDS

- ANON. Übereinkommen über die Regelung der Schollen- und Flundernfischerei in der Ostsee. Der Fischerbote, XXII, 393—96, 1930.
- AWERINZWA, N. S. Über *Pleuronectes glacialis* aus dem Weissen Meer. Zool. Anz. XCI, 156—67, 1930.
- BÜCKMANN, A. Die Überwachung der Alterszusammensetzung des Schollenbestandes in der Deutschen Bucht mit besonderer Berücksichtigung des Fluktuationsproblems. Ber. der Deutsch. Wiss. Komm. für Meeresforsch. N. F. V, 112—25, 1930.
- BUDDENBROCK, W. v. Allgemeine Untersuchungen: Die für die D. W. K. 1928 und 1929 durchgeführten Arbeiten. Ber. der Deutsch. Wiss. Komm. für Meeresforsch. N. F. V, 222—29, 1930.
- FISCHER, E. Die Ostseeuntersuchungen: Bericht über die Arbeiten der D. W. K. in der Abteilung im Deutschen Seefischerei Verein 1926—1929. Ber. der Deutsch. Wiss. Komm. für Meeresforsch. N. F. V, 291—97, 1930.
- HESSLE, C. The young bottom stages of the flounder (*Pleuronectes flesus* L.) at Fårön and the northern part of Gotland. Svenska Hydrografisk-Biologiska Komm. Skrifter, N. S. Biologi, I, Nr. 4, Stockholm, 1930.
- KÄNDLER, R. Untersuchung der Jungfischbestände im Gebiet der Oderbank. Mitt. des Deutsch. Seefisch. Ver. XXXXVI, 474—82, 1930.

## COD

- DRUMMOND, J. C., and HILDITCH, T. P. The Relative Values of Cod Liver Oils from Various Sources. Empire Marketing Board Publication No. 35, London, H. M. S. O. 1930.
- SCHMIDT, JOHS. Racial Investigations. X. The Atlantic Cod (*Gadus callarias* L.) and local races of the same. Comptes-Rendus des Trav. du Laboratoire Carlsberg, XVIII, No. 6, Copenhagen, 1930.
- SCHROEDER, W. G. Migrations and other Phases in the Life History of the Cod off southern New England. Bull. Bureau of Fisheries, XLVI, 1—136, U. S. A. 1930.

## HAKE

- DU BATY, R. R. La Crise de la Pêche au Chalut. La Nature, Nr. 2840, 210—17, Paris, 1930.
- HICKLING, C. F. The Natural History of the Hake. III. Seasonal Changes in the Condition of the Hake. Fishery Investigations, Ser. II, XII, No. 1, 1930.

## TUNNY

- HELDT, H. Le Thon Rouge et sa Pêche (*Thunnus thynnus* L.). Nouveaux aspects de la question. Bull. de la Stat. Océanogr. de Salammbô, No. 18, 1930.
- SELLA, M. Distribution and Migrations of the Tuna, (*Thunnus thynnus* L.) studied by the method of hooks and other Observations. Internation. Revue der gesamt. Hydrobiol. und Hydrogr. XXIV, 446—66, 1930.

## HERRING

- ALTNÖDER, K. Die Untersuchungsfahrten zur Feststellung des Vorkommens von Herbstheringslarven in den Laichperioden, 1928—29. Ber. der Deutsch. Wiss. Komm. für Meeresforsch. N. F. V, 96—111, 1930.
- EHRENBAUM, E. Die Nordseeuntersuchungen: Die Arbeiten der D. W. K. in der Fischereibiologischen Abteilung des Zoologischen Staatsinstituts Hamburg, 1926—1929. Ber. der Deutsch. Wiss. Komm. für Meeresforsch. N. F. V, 264—79, 1930.
- LE GALL, J. Quelques prévisions sur la prochaine saison de pêche du hareng en Manche Orientale. La Pêche Maritime, XIII, 885—886 et 905—06, 9-XI-30 et 16-XI-30.
- LISSNER, H. Monatskarten zur Deutschen Treibnetzfisherei 1929. Ber. der Deutsch. Wiss. Komm. für Meeresforsch. N. F. V, 79—95, 1930.
- ROUNSEFELL, G. A. The Existence and Causes of Dominant Year Classes in the Alaska Herring. Contrib. Marine Biology, 1930, 260—70, Stanford University Press, California, U. S. A.
- SAVAGE, R. E. The Influence of *Phaeocystis* on the Migrations of the Herring. Fishery Investigations, Ser. II, XII, No. 2, 1930.

## PILCHARD, SPRAT AND ANCHOVY

- MEYER, P. F. Der Sardellenfang im Jadebusen. Mitt. des Deutsch. Seefisch. Ver. XXXXVI, 489, 1930.

## Salmon and Freshwater Fish.

- BOLTON, L. L. Sockeye Tagging on the Fraser River, 1928. Bull. XVI of the Biol. Board of Canada, Toronto, 1930.
- CALDERWOOD, W. L. Buckland Foundation Fishery Lectures. No. 1. Modern Views on Salmon Hatching. How its Technique has been improved and developed since the early days. Fishing News, 27—31, 13-XII-30.
- CALDERWOOD, W. L. Buckland Foundation Fishery Lectures. No. 2. Modern Views on Salmon Hatching. Are Artificial Methods equal to those of Nature? Fishing News, 27—31, 20-XII-30.
- CALDERWOOD, W. L. Buckland Foundation Fishery Lectures. No. 3. The Sea and River Life of the Salmon. Habits that are difficult to follow. Fishing News, 27—31, 3-I-1931.
- MINISTRY OF AGRICULTURE AND FISHERIES. Report on Salmon and Freshwater Fisheries for the year 1929. London, 1930.
- NALL, G. H. The Life of the Sea Trout especially in Scottish Waters: with Chapters on the reading and measuring of scales. London, 1930.
- ROULE, L. L'habitat probable du saumon Atlantique (*Salmo salar* L.) pendant sa vie de croissance marine, au large de l'Europe occidentale. C. R. Soc. Biol. Paris, XCIX, 1714—15, 1928.
- TAFT, A. C. The Growth of Salmon. Contrib. Marine Biology, 1930, 253—59, Stanford University Press, California, U. S. A.
- WILLER, A., QUEDNAU, W., und KELLER, A. Untersuchungen über das Wachstum von Fischen. V. Untersuchungen über den Einfluss des Alters der Elterntiere auf das Wachstum der Bachforellenbrut. Zeitschr. für Fischerei, XXVIII, 167—88, 1930.

**Oysters and other Lamellibranchs.**

- GALTSOFF, P. S. The Roll of chemical stimulation in the Spawning reactions of *Ostrea virginica* and *Ostrea gigas*. Proc. National Academy of Sciences, U. S. A. September 1930.
- GALTSOFF, P. S. The Fecundity of the Oyster. Science, LXXII, 97—98, 1930.

**Crustacea.**

- KOLLER, G. Weitere Untersuchungen über Farbwechsel und Farbwechselhormone bei *Crangon vulgaris*. Zeitschr. f. vergleichende Physiol. XII, 632—67, 1930.

**Whales and Seals.**

- ANON. Die Walfangzeit 1929—30. Der Fischerbote, XXII, 345—47, 1930.
- SCHUTT, Dr. Der Walfang das lohnendste Seeverkehrsgewerbe. Naut. Rundschau, Nr. 20, 1930.
- WHEELER, J. F. G. The Age of Fin Whales at Physical Maturity with a Note on Multiple Ovulations. Discovery Reports, II, 403—34, Cambridge, 1930.

**Biological Miscellaneous.**

- DRUMMOND, J. C., and HILDITCH, T. P. The Relative Values of Cod Liver Oils from Various Sources. Empire Marketing Board Publication No. 35, London, H. M. S. O. 1930.
- ELTON, C. Animal Ecology and Evolution. Oxford 1930.
- POWERS, E. B. The Relation between pH and Aquatic Animals. American Naturalist, LXIV, 342—66, 1930.
-
